# Supplementary material for: Fabrication and performance studies of a cable-type flexible asymmetric supercapacitor
Source: Royal Society of Chemistry journal article supplement (doi:10.1039/c4cp00955j), 2014-01-01
Supplement: c4cp00955j1.pdf [file c4cp00955j1.pdf]

## Supporting Information

### Fabrication and Performance Studies of Cable-type Flexible Asymmetric Supercapacitor

**S. T. Senthilkumar and R. Kalai Selvan**

*Solid State Ionics and Energy Devices Laboratory, Department of Physics, Bharathiar University, Coimbatore-641046, Tamil Nadu, India*

\*E-mail: selvankram@buc.edu.in

**Figure S1:**

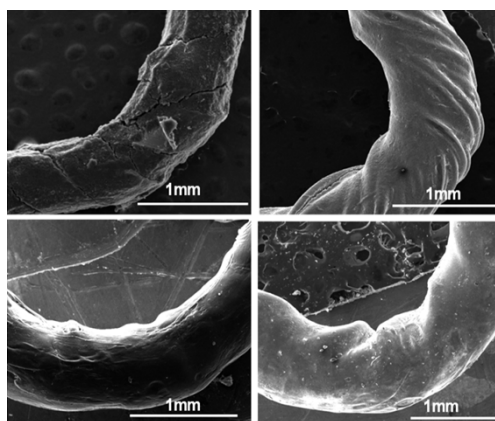

**Figure S1.** (a, b) AC and Ni(OH)<sub>2</sub> coated fiber electrode at bending and (c, d) PVA/KOH gel electrolyte coated AC and Ni(OH)<sub>2</sub> fiber electrode at bending.

**Figure S2:**

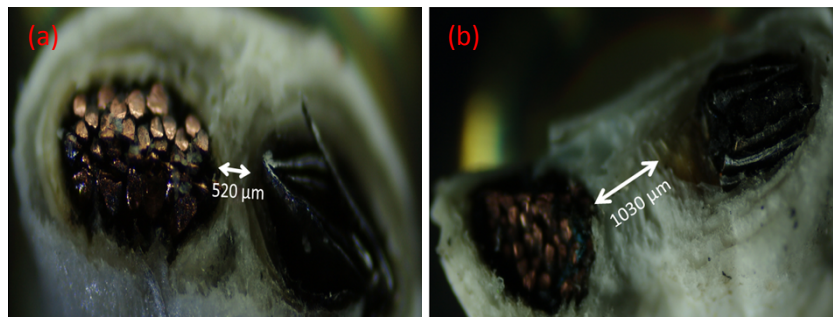

**Figure S2.** (a, b) Microscopy cross-section image of cable ASC at different distance between the electrodes

Figure S3.

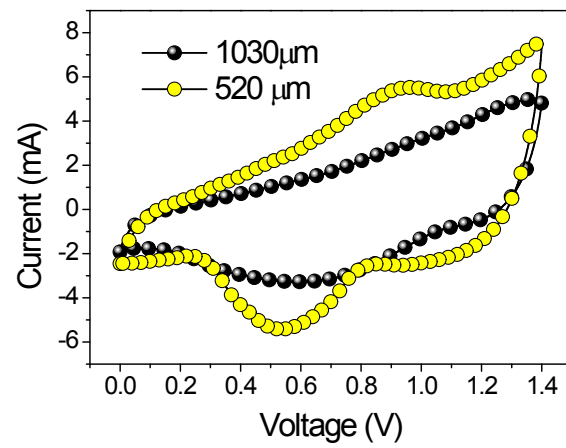

Figure S3. CV curve at  $5 \text{ mV s}^{-1}$  for cable ASC at the distance between the electrodes is  $\sim 520 \text{ }\mu\text{m}$  and  $\sim 1030 \text{ }\mu\text{m}$ .
